# Supplementary material for: Exploring the Relationship between Reactivity and Electronic Structure in Isorhodanine Derivatives Using Computer Simulations
Source: MDPI journal article supplement (doi:10.3390/molecules28052360), 2023-03-03
Supplement: s1 [file s1]

## **Electronic Supporting Information for:**

Exploring the relationship between reactivity and electronic structure in isorhodanine derivatives using computer simulations

Michał Michalski <sup>1)</sup>, Sławomir Berski <sup>2)</sup>

1. Centre of New Technologies, University of Warsaw, 02-097, Warsaw, Poland
2. Faculty of Chemistry, University of Wrocław, 50-383, Wrocław, Poland

**Table S1.** The values of ELF basin population,  $\bar{N}(e)$ , for all studied IsRd derivatives.

| <b>R</b>                                            | <b>V(N,H1)</b> | <b>V(C4,H2)</b> | <b>V(N,C2)</b> | <b>V(N,C1)</b> | <b>V(C1,C3)</b> | <b>V(C1,S1)</b> | <b>V(C2,O)</b> | <b>V(C2,S2)</b> | <b>V(C3,S2)</b> | <b>V(C3,C4)</b> | <b>V(C3,C4)</b> |
|-----------------------------------------------------|----------------|-----------------|----------------|----------------|-----------------|-----------------|----------------|-----------------|-----------------|-----------------|-----------------|
| <b>-SO<sub>2</sub>CF<sub>3</sub></b>                | 2.05           | 2.16            | 2.09           | 2.09           | 2.23            | 2.66            | 2.49           | 1.9             | 1.83            | 1.77            | 1.77            |
| <b>-NO<sub>2</sub></b>                              | 2.06           | 2.20            | 2.09           | 2.11           | 2.23            | 2.63            | 2.49           | 1.91            | 1.82            | 1.81            | 1.82            |
| <b>-SO<sub>3</sub>H</b>                             | 2.05           | 2.16            | 2.10           | 2.08           | 2.23            | 2.68            | 2.48           | 1.91            | 1.82            | 1.76            | 1.78            |
| <b>-CN</b>                                          | 2.06           | 2.12            | 2.09           | 2.10           | 2.25            | 2.62            | 2.49           | 1.91            | 1.85            | 1.70            | 1.70            |
| <b>-CF<sub>3</sub></b>                              | 2.06           | 2.14            | 2.09           | 2.10           | 2.23            | 2.63            | 2.48           | 1.92            | 1.81            | 1.76            | 1.76            |
| <b>-CHO</b>                                         | 2.06           | 2.12            | 2.08           | 2.14           | 2.24            | 2.56            | 2.48           | 1.94            | 1.82            | 1.71            | 1.71            |
| <b>-COOH</b>                                        | 2.06           | 2.13            | 2.08           | 2.13           | 2.24            | 2.58            | 2.47           | 1.93            | 1.81            | 1.77            | 1.74            |
| <b>-NO</b>                                          | 2.06           | 2.18            | 2.08           | 2.10           | 2.23            | 2.66            | 2.48           | 1.91            | 1.85            | 1.76            | 1.72            |
| <b>-Br</b>                                          | 2.06           | 2.18            | 2.10           | 2.10           | 2.28            | 2.58            | 2.46           | 1.92            | 1.77            | 1.79            | 1.79            |
| <b>-Cl</b>                                          | 2.06           | 2.19            | 2.10           | 2.10           | 2.28            | 2.58            | 2.46           | 1.92            | 1.78            | 1.80            | 1.80            |
| <b>-H</b>                                           | 2.06           | 2.12            | 2.08           | 2.15           | 2.23            | 2.55            | 2.47           | 1.93            | 1.80            | 1.72            | 1.72            |
| <b>-Ph</b>                                          | 2.06           | 2.12            | 2.09           | 2.12           | 2.27            | 2.55            | 2.45           | 1.94            | 1.77            | 1.69            | 1.79            |
| <b>-NHCOCH<sub>3</sub></b>                          | 2.06           | 2.17            | 2.09           | 2.11           | 2.38            | 2.43            | 2.45           | 1.93            | 1.76            | 1.75            | 1.75            |
| <b>-OCH<sub>3</sub></b>                             | 2.05           | 2.21            | 2.08           | 2.11           | 2.32            | 2.53            | 2.44           | 1.92            | 1.76            | 1.80            | 1.80            |
| <b>-OH</b>                                          | 2.05           | 2.22            | 2.08           | 2.10           | 2.31            | 2.54            | 2.44           | 1.92            | 1.76            | 1.80            | 1.81            |
| <b>-N(CH<sub>3</sub>)<sub>2</sub></b>               | 2.05           | 2.18            | 2.06           | 2.12           | 2.54            | 2.40            | 2.41           | 1.93            | 1.71            | 3.39            |                 |
| <b>-N(CH<sub>2</sub>CH<sub>3</sub>)<sub>2</sub></b> | 2.05           | 2.17            | 2.06           | 2.12           | 2.55            | 2.40            | 2.41           | 1.94            | 1.72            | 3.38            |                 |
| <b>-N(Pr)<sub>2</sub></b>                           | 2.05           | 2.17            | 2.05           | 2.13           | 2.55            | 2.40            | 2.41           | 1.94            | 1.72            | 3.37            |                 |
| <b>-NHCH<sub>3</sub></b>                            | 2.05           | 2.16            | 2.08           | 2.11           | 2.53            | 2.34            | 2.42           | 1.94            | 1.73            | 3.40            |                 |
| <b>-NH<sub>2</sub></b>                              | 2.05           | 2.16            | 2.09           | 2.10           | 2.47            | 2.37            | 2.43           | 1.94            | 1.74            | 3.43            |                 |
| <b>-S<sup>-</sup></b>                               | 2.04           | 2.13            | 1.98           | 2.20           | 2.72            | 2.35            | 2.27           | 1.98            | 1.68            | 3.16            |                 |
| <b>-O<sup>-</sup></b>                               | 2.04           | 2.17            | 1.97           | 2.22           | 3.37            | 2.26            | 2.25           | 1.98            | 1.66            | 2.59            |                 |

**Table S2.** The values of electron density on bond critical point,  $\rho_{(3,-1)}(r)$  ( $e/a.u.^3$ ), for all studied IsRd derivatives.

| <b>R</b>                                            | <b>N-H1</b> | <b>C4-H2</b> | <b>N-C2</b> | <b>N-C1</b> | <b>C1-C3</b> | <b>C1-S1</b> | <b>C2-O</b> | <b>C2-S2</b> | <b>C3-S2</b> | <b>C3-C4</b> |
|-----------------------------------------------------|-------------|--------------|-------------|-------------|--------------|--------------|-------------|--------------|--------------|--------------|
| <b>-SO<sub>2</sub>CF<sub>3</sub></b>                | 0.332       | 0.279        | 0.302       | 0.305       | 0.258        | 0.228        | 0.428       | 0.190        | 0.195        | 0.332        |
| <b>-NO<sub>2</sub></b>                              | 0.332       | 0.284        | 0.301       | 0.306       | 0.259        | 0.226        | 0.427       | 0.190        | 0.194        | 0.338        |
| <b>-SO<sub>3</sub>H</b>                             | 0.333       | 0.281        | 0.304       | 0.304       | 0.258        | 0.228        | 0.427       | 0.190        | 0.194        | 0.332        |
| <b>-CN</b>                                          | 0.333       | 0.281        | 0.302       | 0.305       | 0.261        | 0.226        | 0.427       | 0.190        | 0.197        | 0.331        |
| <b>-CF<sub>3</sub></b>                              | 0.333       | 0.282        | 0.302       | 0.305       | 0.258        | 0.226        | 0.426       | 0.192        | 0.194        | 0.334        |
| <b>-CHO</b>                                         | 0.333       | 0.281        | 0.299       | 0.308       | 0.259        | 0.224        | 0.426       | 0.194        | 0.194        | 0.330        |
| <b>-COOH</b>                                        | 0.333       | 0.279        | 0.299       | 0.308       | 0.261        | 0.225        | 0.426       | 0.193        | 0.193        | 0.336        |
| <b>-NO</b>                                          | 0.333       | 0.281        | 0.303       | 0.303       | 0.259        | 0.227        | 0.427       | 0.189        | 0.198        | 0.333        |
| <b>-Br</b>                                          | 0.333       | 0.286        | 0.302       | 0.305       | 0.263        | 0.224        | 0.425       | 0.193        | 0.190        | 0.333        |
| <b>-Cl</b>                                          | 0.333       | 0.286        | 0.302       | 0.304       | 0.264        | 0.223        | 0.425       | 0.193        | 0.190        | 0.334        |
| <b>-H</b>                                           | 0.333       | 0.281        | 0.298       | 0.308       | 0.261        | 0.223        | 0.425       | 0.193        | 0.194        | 0.339        |
| <b>-Ph</b>                                          | 0.333       | 0.279        | 0.301       | 0.305       | 0.262        | 0.222        | 0.424       | 0.195        | 0.190        | 0.330        |
| <b>-NHCOCH<sub>3</sub></b>                          | 0.333       | 0.286        | 0.300       | 0.306       | 0.278        | 0.217        | 0.424       | 0.193        | 0.190        | 0.323        |
| <b>-OCH<sub>3</sub></b>                             | 0.333       | 0.284        | 0.303       | 0.301       | 0.272        | 0.221        | 0.423       | 0.192        | 0.190        | 0.331        |
| <b>-OH</b>                                          | 0.333       | 0.286        | 0.303       | 0.302       | 0.271        | 0.222        | 0.424       | 0.192        | 0.190        | 0.333        |
| <b>-N(CH<sub>3</sub>)<sub>2</sub></b>               | 0.334       | 0.283        | 0.305       | 0.299       | 0.282        | 0.214        | 0.421       | 0.193        | 0.188        | 0.312        |
| <b>-N(CH<sub>2</sub>CH<sub>3</sub>)<sub>2</sub></b> | 0.334       | 0.282        | 0.305       | 0.299       | 0.282        | 0.214        | 0.421       | 0.193        | 0.188        | 0.310        |
| <b>-N(Pr)<sub>2</sub></b>                           | 0.334       | 0.282        | 0.305       | 0.298       | 0.282        | 0.214        | 0.420       | 0.193        | 0.188        | 0.310        |
| <b>-NHCH<sub>3</sub></b>                            | 0.334       | 0.284        | 0.302       | 0.302       | 0.289        | 0.213        | 0.422       | 0.193        | 0.190        | 0.313        |
| <b>-NH<sub>2</sub></b>                              | 0.333       | 0.286        | 0.301       | 0.304       | 0.286        | 0.214        | 0.422       | 0.193        | 0.190        | 0.317        |
| <b>-S<sup>-</sup></b>                               | 0.336       | 0.277        | 0.313       | 0.285       | 0.295        | 0.212        | 0.408       | 0.197        | 0.184        | 0.301        |
| <b>-O<sup>-</sup></b>                               | 0.336       | 0.268        | 0.315       | 0.282       | 0.304        | 0.206        | 0.407       | 0.195        | 0.186        | 0.286        |

**Table S3.** The values of Laplacian on bond critical point,  $\nabla^2\rho_{(3,-1)}(r)$  (e/au<sup>5</sup>), for all studied IsRd derivatives.

| <b>R</b>                                            | <b>N-H1</b> | <b>C4-H2</b> | <b>N-C2</b> | <b>N-C1</b> | <b>C1-C3</b> | <b>C1-S1</b> | <b>C2-O</b> | <b>C2-S2</b> | <b>C3-S2</b> | <b>C3-C4</b> |
|-----------------------------------------------------|-------------|--------------|-------------|-------------|--------------|--------------|-------------|--------------|--------------|--------------|
| <b>-SO<sub>2</sub>CF<sub>3</sub></b>                | -1.735      | -0.948       | -0.853      | -0.775      | -0.619       | 0.156        | 0.092       | -0.309       | -0.342       | -0.938       |
| <b>-NO<sub>2</sub></b>                              | -1.734      | -0.994       | -0.849      | -0.774      | -0.620       | 0.141        | 0.084       | -0.312       | -0.336       | -0.971       |
| <b>-SO<sub>3</sub>H</b>                             | -1.732      | -0.963       | -0.856      | -0.774      | -0.617       | 0.155        | 0.081       | -0.313       | -0.336       | -0.945       |
| <b>-CN</b>                                          | -1.733      | -0.970       | -0.852      | -0.769      | -0.630       | 0.131        | 0.082       | -0.313       | -0.350       | -0.949       |
| <b>-CF<sub>3</sub></b>                              | -1.732      | -0.971       | -0.850      | -0.772      | -0.615       | 0.136        | 0.076       | -0.322       | -0.333       | -0.956       |
| <b>-CHO</b>                                         | -1.733      | -0.967       | -0.840      | -0.775      | -0.620       | 0.091        | 0.079       | -0.329       | -0.332       | -0.951       |
| <b>-COOH</b>                                        | -1.731      | -0.957       | -0.841      | -0.768      | -0.631       | 0.110        | 0.072       | -0.324       | -0.331       | -0.963       |
| <b>-NO</b>                                          | -1.731      | -0.969       | -0.858      | -0.776      | -0.620       | 0.132        | 0.085       | -0.308       | -0.351       | -0.971       |
| <b>-Br</b>                                          | -1.731      | -0.998       | -0.849      | -0.770      | -0.638       | 0.097        | 0.058       | -0.324       | -0.315       | -0.949       |
| <b>-Cl</b>                                          | -1.731      | -1.002       | -0.850      | -0.769      | -0.641       | 0.098        | 0.059       | -0.323       | -0.319       | -0.955       |
| <b>-H</b>                                           | -1.730      | -0.973       | -0.839      | -0.758      | -0.629       | 0.097        | 0.068       | -0.325       | -0.332       | -0.998       |
| <b>-Ph</b>                                          | -1.727      | -0.954       | -0.846      | -0.766      | -0.631       | 0.080        | 0.049       | -0.334       | -0.315       | -0.943       |
| <b>-NHCOCH<sub>3</sub></b>                          | -1.728      | -1.007       | -0.840      | -0.764      | -0.697       | -0.003       | 0.044       | -0.323       | -0.318       | -0.906       |
| <b>-OCH<sub>3</sub></b>                             | -1.725      | -0.988       | -0.855      | -0.755      | -0.675       | 0.072        | 0.035       | -0.319       | -0.316       | -0.954       |
| <b>-OH</b>                                          | -1.726      | -1.004       | -0.855      | -0.757      | -0.670       | 0.080        | 0.040       | -0.319       | -0.317       | -0.965       |
| <b>-N(CH<sub>3</sub>)<sub>2</sub></b>               | -1.723      | -0.981       | -0.857      | -0.758      | -0.707       | -0.037       | 0.011       | -0.323       | -0.304       | -0.855       |
| <b>-N(CH<sub>2</sub>CH<sub>3</sub>)<sub>2</sub></b> | -1.723      | -0.975       | -0.857      | -0.756      | -0.705       | -0.039       | 0.008       | -0.324       | -0.304       | -0.848       |
| <b>-N(Pr)<sub>2</sub></b>                           | -1.723      | -0.976       | -0.858      | -0.755      | -0.705       | -0.040       | 0.007       | -0.324       | -0.304       | -0.847       |
| <b>-NHCH<sub>3</sub></b>                            | -1.723      | -0.996       | -0.844      | -0.750      | -0.744       | -0.087       | 0.015       | -0.321       | -0.314       | -0.862       |
| <b>-NH<sub>2</sub></b>                              | -1.724      | -1.007       | -0.842      | -0.755      | -0.731       | -0.062       | 0.023       | -0.323       | -0.315       | -0.882       |
| <b>-S<sup>-</sup></b>                               | -1.697      | -0.934       | -0.875      | -0.687      | -0.765       | -0.095       | -0.101      | -0.341       | -0.281       | -0.803       |
| <b>-O<sup>-</sup></b>                               | -1.695      | -0.888       | -0.881      | -0.672      | -0.803       | -0.151       | -0.117      | -0.332       | -0.287       | -0.747       |

**Table S4.** The values of delocalisation index, DI, for all studied IsRd derivatives.

| <b>R</b>                                            | <b>N-H1</b> | <b>C4-H2</b> | <b>N-C2</b> | <b>N-C1</b> | <b>C1-C3</b> | <b>C1-S1</b> | <b>C2-O</b> | <b>C2-S2</b> | <b>C3-S2</b> | <b>C3-C4</b> |
|-----------------------------------------------------|-------------|--------------|-------------|-------------|--------------|--------------|-------------|--------------|--------------|--------------|
| <b>-SO<sub>2</sub>CF<sub>3</sub></b>                | 0.716       | 0.903        | 0.950       | 1.064       | 1.005        | 1.780        | 1.354       | 1.016        | 1.149        | 1.695        |
| <b>-NO<sub>2</sub></b>                              | 0.723       | 0.907        | 0.951       | 1.064       | 1.009        | 1.770        | 1.353       | 1.025        | 1.136        | 1.683        |
| <b>-SO<sub>3</sub>H</b>                             | 0.725       | 0.911        | 0.956       | 1.059       | 1.007        | 1.784        | 1.362       | 1.018        | 1.145        | 1.697        |
| <b>-CN</b>                                          | 0.716       | 0.916        | 0.952       | 1.058       | 1.018        | 1.765        | 1.353       | 1.023        | 1.154        | 1.634        |
| <b>-CF<sub>3</sub></b>                              | 0.729       | 0.920        | 0.945       | 1.062       | 1.010        | 1.770        | 1.351       | 1.032        | 1.136        | 1.697        |
| <b>-CHO</b>                                         | 0.729       | 0.921        | 0.937       | 1.076       | 1.020        | 1.741        | 1.350       | 1.040        | 1.138        | 1.659        |
| <b>-COOH</b>                                        | 0.724       | 0.929        | 0.942       | 1.065       | 1.015        | 1.745        | 1.357       | 1.042        | 1.129        | 1.701        |
| <b>-NO</b>                                          | 0.725       | 0.907        | 0.948       | 1.061       | 1.014        | 1.780        | 1.355       | 1.014        | 1.164        | 1.596        |
| <b>-Br</b>                                          | 0.727       | 0.923        | 0.947       | 1.063       | 1.039        | 1.736        | 1.347       | 1.041        | 1.114        | 1.667        |
| <b>-Cl</b>                                          | 0.736       | 0.918        | 0.946       | 1.061       | 1.041        | 1.737        | 1.340       | 1.040        | 1.116        | 1.652        |
| <b>-H</b>                                           | 0.728       | 0.953        | 0.937       | 1.074       | 1.015        | 1.740        | 1.351       | 1.049        | 1.130        | 1.736        |
| <b>-Ph</b>                                          | 0.729       | 0.925        | 0.945       | 1.063       | 1.039        | 1.722        | 1.340       | 1.055        | 1.116        | 1.648        |
| <b>-NHCOCH<sub>3</sub></b>                          | 0.723       | 0.892        | 0.951       | 1.064       | 1.113        | 1.636        | 1.337       | 1.053        | 1.116        | 1.501        |
| <b>-OCH<sub>3</sub></b>                             | 0.730       | 0.898        | 0.956       | 1.050       | 1.081        | 1.704        | 1.330       | 1.045        | 1.115        | 1.544        |
| <b>-OH</b>                                          | 0.731       | 0.913        | 0.963       | 1.049       | 1.073        | 1.714        | 1.337       | 1.045        | 1.114        | 1.564        |
| <b>-N(CH<sub>3</sub>)<sub>2</sub></b>               | 0.725       | 0.896        | 0.972       | 1.043       | 1.172        | 1.589        | 1.326       | 1.054        | 1.112        | 1.394        |
| <b>-N(CH<sub>2</sub>CH<sub>3</sub>)<sub>2</sub></b> | 0.730       | 0.891        | 0.965       | 1.042       | 1.175        | 1.587        | 1.323       | 1.053        | 1.112        | 1.391        |
| <b>-N(Pr)<sub>2</sub></b>                           | 0.730       | 0.890        | 0.966       | 1.041       | 1.177        | 1.585        | 1.327       | 1.054        | 1.112        | 1.388        |
| <b>-NHCH<sub>3</sub></b>                            | 0.736       | 0.901        | 0.963       | 1.050       | 1.191        | 1.559        | 1.326       | 1.059        | 1.116        | 1.393        |
| <b>-NH<sub>2</sub></b>                              | 0.723       | 0.912        | 0.958       | 1.055       | 1.166        | 1.583        | 1.333       | 1.061        | 1.116        | 1.430        |
| <b>-S<sup>-</sup></b>                               | 0.750       | 0.938        | 1.002       | 0.999       | 1.253        | 1.548        | 1.273       | 1.083        | 1.086        | 1.356        |
| <b>-O<sup>-</sup></b>                               | 0.748       | 0.880        | 1.012       | 0.987       | 1.336        | 1.491        | 1.274       | 1.083        | 1.102        | 1.157        |
